# Supplementary material for: Structural characterization of a soil viral auxiliary metabolic gene product – a functional chitosanase
Source: PubMed Central journal article supplement (PMC9485262; doi:10.1038/s41467-022-32993-8), 2022-09-19
Supplement: 41467_2022_32993_MOESM3_ESM.pdf [file 41467_2022_32993_MOESM3_ESM.pdf]

File Name: Supplementary Data 1

Description: Multiple alignment of bacterial, fungal and viral chitosanase protein sequences. Sequences with headers containing 'ref\_bact', 'ref\_fungi' and 'exp\_virus' are bacterial, fungal and viral chitosanase sequences, respectively. The chitosanase sequences were aligned with a phage lysozyme (YP\_006987285, 'OutGroup') as an outgroup sequence for the phylogenetic tree construction. '-' represents the gap within the alignments.
